# Supplementary material
Source: PubMed Central journal article supplement (PMC3095138)
Supplement: supp_jn.111.138750_nut_138750_F1.pdf [file supp_jn.111.138750_nut_138750_F1.pdf]

## Online Supporting Material

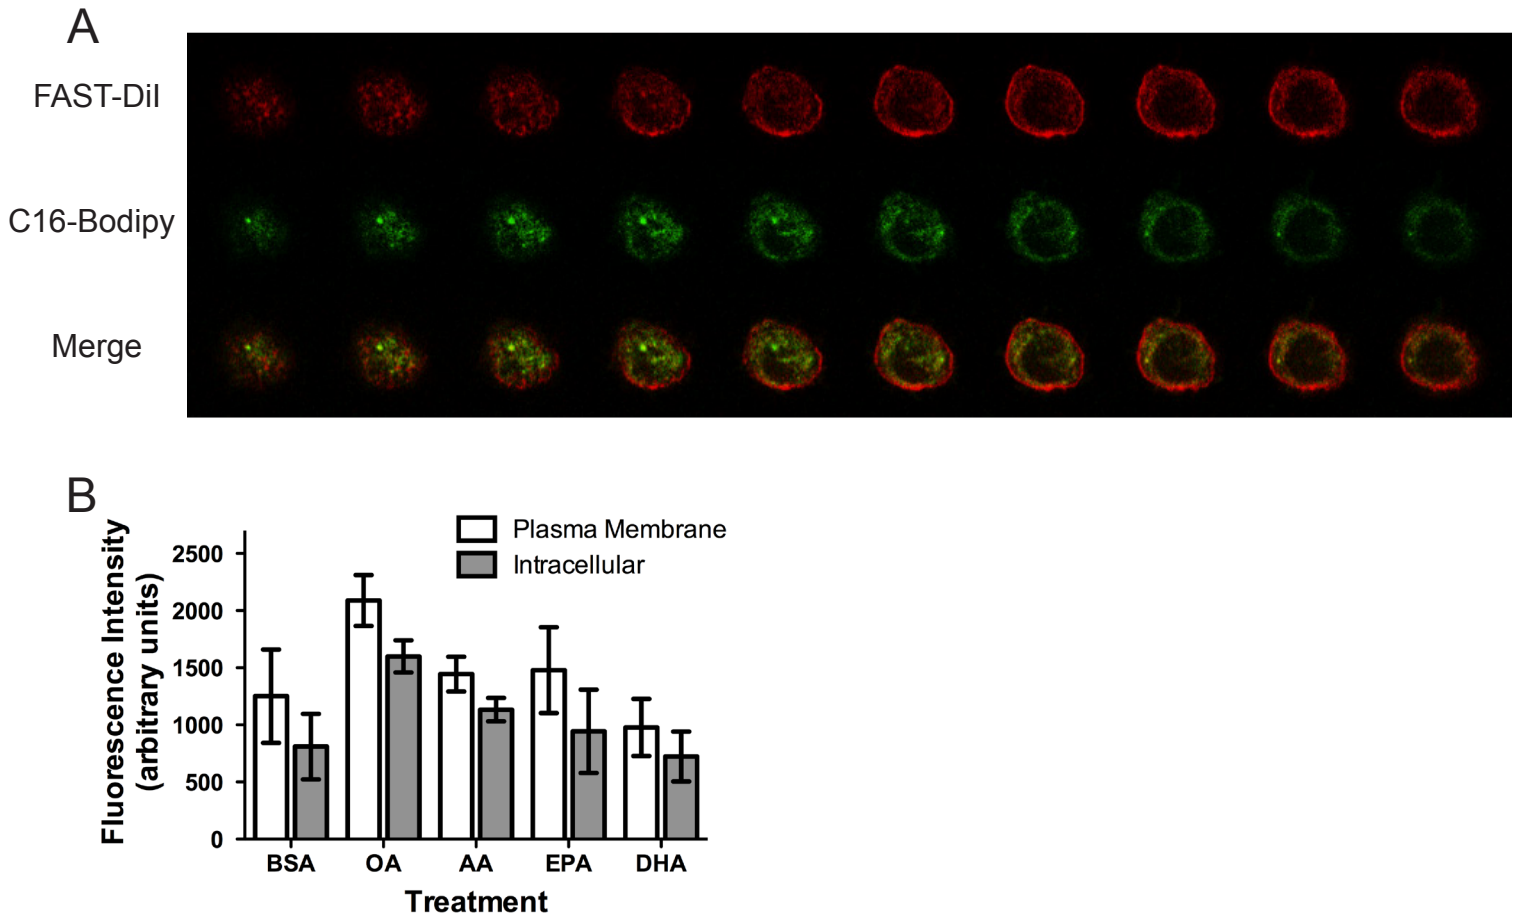

**Supplemental Figure 1: C16-Bodipy imaging studies.** (A) EL4 cells were co-stained with FAST-Dil and C16-Bodipy. The images are from a single z-stack used to calculate percent co-localization. The data are representative of 2 separate experiments. Co-localization is indicated by orange in the merge. (B) Average C16-Bodipy intracellular and plasma membrane image intensity for EL4 cells treated overnight with BSA, OA, AA, EPA, and DHA. Data are means  $\pm$  SEM, n= 4.
