# Supplementary material
Source: PubMed Central journal article supplement (PMC3095138)
Supplement: supp_jn.111.138750_nut_138750_F2.pdf [file supp_jn.111.138750_nut_138750_F2.pdf]

## Online Supporting Material

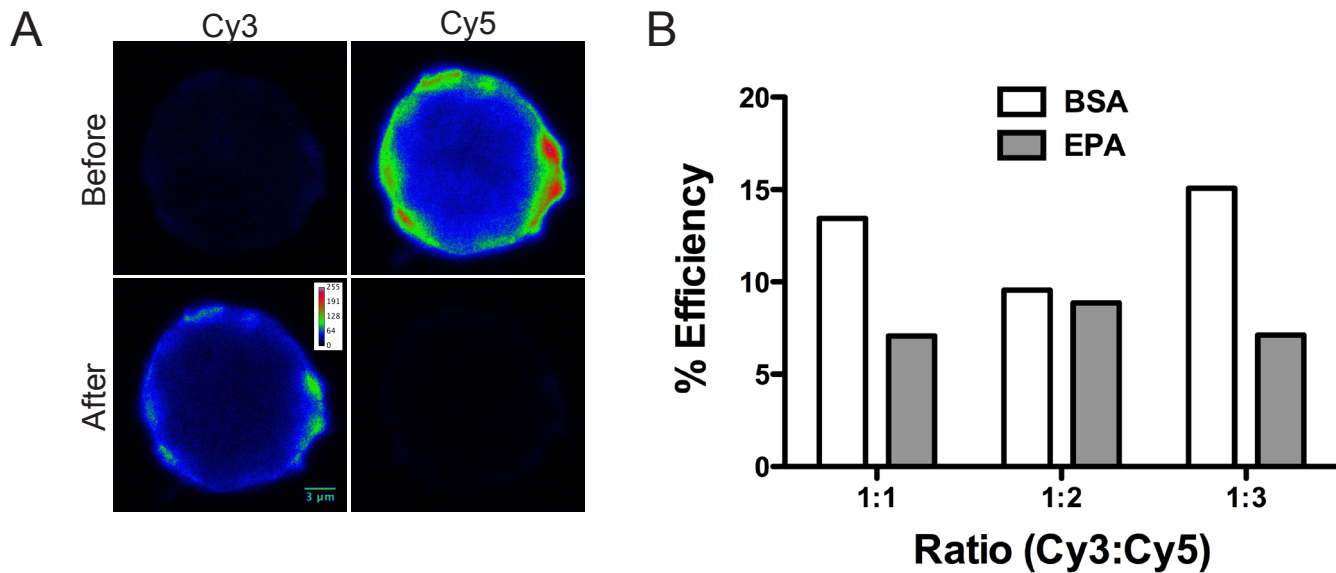

### Supplemental Figure 2: MHC class I molecules were randomly distributed on EL4 cells.

(A) Positive control before and after photobleaching images of EL4 cells stained with Cy3 (donor) and Cy5 (acceptor) labeled antibodies against MHC I. FRET efficiency increased by ~80%.

(B) Sample data from a single experiment to show BSA or EPA treatment did not modify MHC I clustering since efficiency values did not increase with increasing donor:acceptor ratio. However, note EPA treatment lowered FRET values relative to BSA.
