# Supplementary material
Source: PubMed Central journal article supplement (PMC3095138)
Supplement: supp_jn.111.138750_nut_138750_F3.pdf [file supp_jn.111.138750_nut_138750_F3.pdf]

## Online Supporting Material

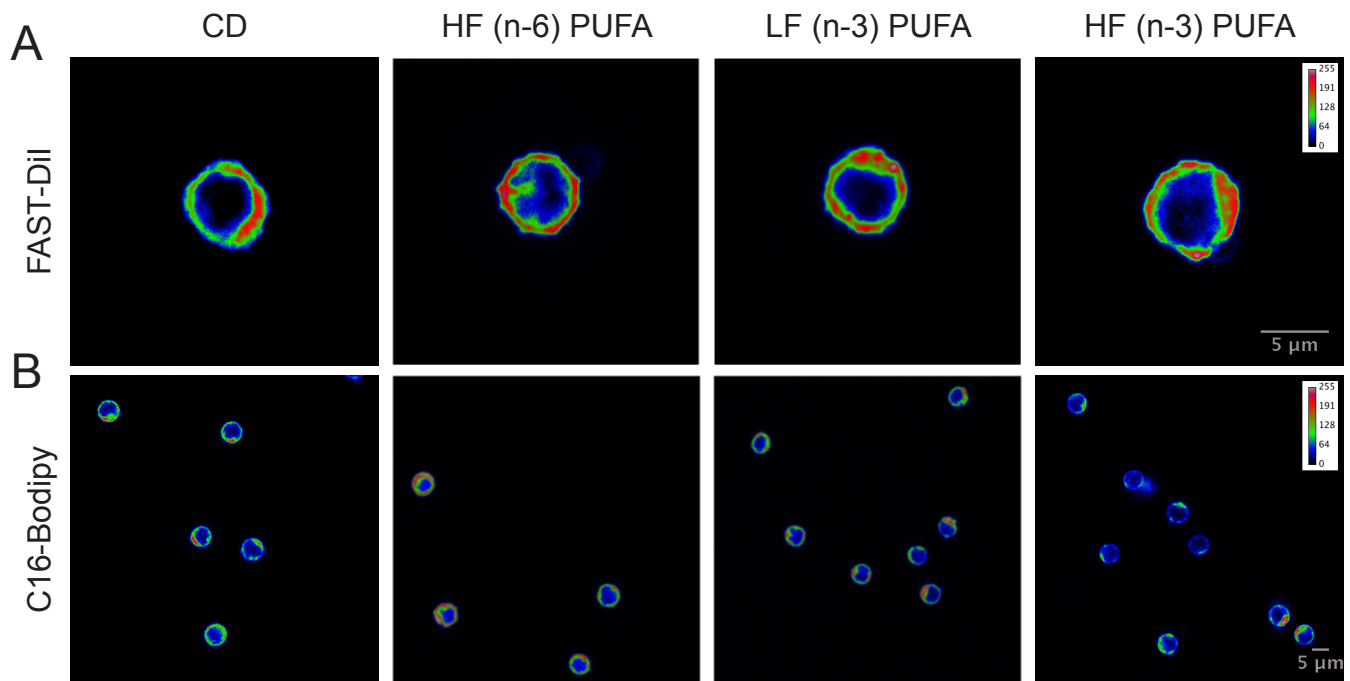

**Supplemental Figure 3: (n-3) PUFA diets did not increase FAST-Dil accumulation but HF (n-3) PUFA diet lowered C16-Bodipy uptake.** (A) Fluorescent images of B cells isolated from C57BL/6 mice fed CD, HF (n-6), LF or HF (n-3) PUFA diets and stained with FAST-Dil. (B) Fluorescent C16-Bodipy images of B cells isolated from mice fed differing diets. Images are on a rainbow palette to discriminate differences in relative fluorescence intensity. Red and blue values, respectively, indicate high and low fluorescence intensity.
