# Supplementary material
Source: PubMed Central journal article supplement (PMC3095138)
Supplement: supp_jn.111.138750_nut_138750_F4.pdf [file supp_jn.111.138750_nut_138750_F4.pdf]

## Online Supporting Material

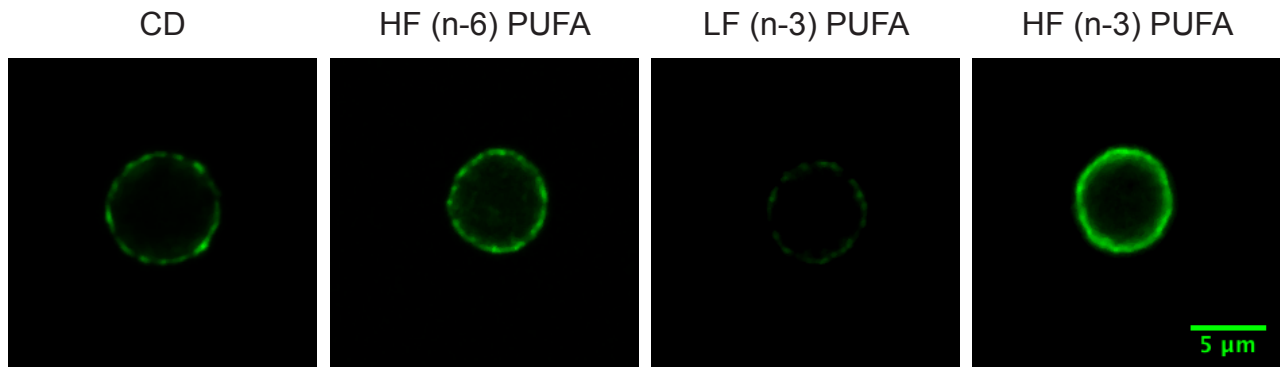

**Supplemental Figure 4: HF (n-3) PUFA diet disrupted lipid raft clustering.** Fluorescent images of B cells isolated from C57BL/6 mice fed CD, HF (n-6), LF or HF (n-3) PUFA diets and stained for lipid rafts.
