# Supplementary material
Source: PubMed Central journal article supplement (PMC3095138)
Supplement: supp_jn.111.138750_nut_138750_T1.pdf [file supp_jn.111.138750_nut_138750_T1.pdf]

## Online Supporting Material

**Supplemental Table 1: Fatty acid analysis of experimental diets<sup>1</sup>**

| Fatty Acid        | CD   | LF (n-3) PUFA | HF (n-3) PUFA | HF (n-6) PUFA |
|-------------------|------|---------------|---------------|---------------|
| 14:0              | 0.5  | 3.1           | 3.7           | 4.6           |
| 16:0              | 12.2 | 14.6          | 13.6          | 10.0          |
| 16:1              | 0.1  | 4.3           | 4.9           | 0.1           |
| 18:0              | 6.9  | 8.7           | 7.2           | 7.5           |
| 18:1 <i>trans</i> | 0.5  | 1.5           | 0.9           | 0.5           |
| 18:1 <i>cis</i>   | 20.5 | 16.0          | 15.7          | 15.5          |
| 18:2 (n-6)        | 48.0 | 13.6          | 12.1          | 58.3          |
| 18:3 (n-3)        | 6.5  | 24.1          | 26.9          | 1.4           |
| 20:5 (n-3)        | 0.0  | 4.4           | 5.0           | 0.1           |
| 22:2 (n-6)        | 0.2  | 0.7           | 0.6           | 0.0           |
| 22:5 (n-3)        | 0.1  | 0.8           | 0.8           | 0.0           |
| 22:6 (n-3)        | 0.0  | 3.3           | 3.5           | 0.1           |
| ΣSFA              | 20.4 | 27.0          | 25.0          | 22.6          |
| ΣMUFA             | 23.0 | 24.3          | 24.0          | 17.1          |
| ΣPUFA (n-3)       | 6.6  | 32.6          | 36.2          | 1.5           |
| ΣPUFA (n-6)       | 50.0 | 16.1          | 14.8          | 58.7          |

<sup>1</sup>Fatty acids were extracted from the diets and analyzed with gas chromatography. Values are the percentage of total fatty acids. Values less than 0.5 are omitted for clarity.
